# Supplementary material for: Bioinspired nanoscale hierarchical pillars for extreme superhydrophobicity and wide angular transmittance
Source: Royal Society of Chemistry journal article supplement (doi:10.1039/d1na00806d), 2021-12-24
Supplement: d1na00806d4.pdf [file d1na00806d4.pdf]

Supporting Information

# Bioinspired Nanoscale Hierarchical Pillars for Extreme Superhydrophobicity and Wide Angular Transmittance

*Cheonji Lee,<sup>a,b,†</sup> Seungmuk Ji,<sup>c,†</sup> Sunjong Oh,<sup>a</sup> Seungchul Park,<sup>a</sup> Youngdo Jung,<sup>a</sup> Jinkee Lee,<sup>b,\*</sup>  
and Hyuneui Lim<sup>a,d,\*</sup>*

<sup>a</sup>Department of Nature-Inspired Nanoconvergence Systems, Korea Institute of Machinery and Materials, 156 Gajeongbuk-Ro, Yuseong-Gu, Daejeon, 34103, Republic of Korea

<sup>b</sup>School of Mechanical Engineering, Sungkyunkwan University, 2066, Seobu-Ro, Jangan-Gu, Suwon, Gyeonggi-Do, 16419, Republic of Korea

<sup>c</sup>Yonsei Institute of Convergence Technology, Yonsei University, 85 Songdogwahak-ro, Yeonsu-gu, Incheon 21983, South Korea

<sup>d</sup>Department of Nano-mechatronics, University of Science and Technology, 217 Gajeongbuk-Ro, Yuseong-Gu, Daejeon, 34113, Republic of Korea

**Table S1.** Minimum and maximum Capillary pressure ( $P_c$ ) and the effective slip length ( $b_{eff}$ ) of samples. The  $P_c$  of long pillars are marked with L and that of short pillars are marked with S.

| Surface                                    | S <sub>120</sub> | S <sub>350</sub> | S <sub>NH1</sub>     | S <sub>NH2</sub>     |
|--------------------------------------------|------------------|------------------|----------------------|----------------------|
| Minimum Capillary pressure ( $P_c$ ) (MPa) | 3.57             | 0.88             | 0.63 (L)<br>5.88 (S) | 0.17 (L)<br>7.76 (S) |
| Maximum Capillary pressure ( $P_c$ ) (MPa) | 23.97            | 8.08             | 23.97                | 23.97                |
| Effective slip length ( $b_{eff}$ ) (nm)   | 31.7 ± 2.2       | 108.5 ± 7.0      | 524.8 ± 15.3         | 807 ± 24.0           |

**Movie S1.** Contact angle measurement. Attaching a water droplet on samples;  $S_{120}$ ,  $S_{350}$ ,  $S_{NH1}$ , and  $S_{NH2}$ . Volume of droplet is  $10.3 \mu\text{l}$ .

**Movie S2.** Droplet impact motion. Droplets impact on  $S_{NH2}$  with different dropped height; 80, 230, and 450 mm (Weber number; 48, 140, and 290). The volume of droplet is  $8.6 \mu\text{l}$ . The process is recorded at 3000 frames per second (fps) and shown at 30 fps.

**Movie S3.** Number of bouncing. Droplets bounce on samples;  $S_{120}$ ,  $S_{350}$ ,  $S_{NH1}$ , and  $S_{NH2}$ . The dropped height is 10 mm and volume of droplet is  $8.6 \mu\text{l}$ . The process is recorded at 3000 frames per second (fps) and shown at 30 fps.
